# Supplementary material for: Patterns of Antipsychotic Prescribing by Physicians to Young Children
Source: Atypon-hosted journal article supplement (doi:10.1176/appi.ps.201500224), 2016-07-15
Supplement: appi.ps.201500224.ds001.pdf [file appi.ps.201500224.ds001.pdf]

Appendix Table: FDA Approved Indications for Antipsychotic Medications for Children, 2008-2011

| Drug Name                            | FDA Approved Child/Adolescent Indications,<br>Ages                                                         | At Least One FDA<br>Approved<br>Indication for<br>Children 0-9 |
|--------------------------------------|------------------------------------------------------------------------------------------------------------|----------------------------------------------------------------|
| Second Generation<br>Antipsychotics: |                                                                                                            |                                                                |
| Aripiprazole                         | Schizophrenia, 13-17<br><br>Bipolar disorder acute, 10-17<br><br>Irritability associated with autism, 6-17 | Yes                                                            |
| Asenapine                            | None                                                                                                       | No                                                             |
| Clozapine                            | None                                                                                                       | No                                                             |
| Iloperidone                          | None                                                                                                       | No                                                             |
| Lurasidone                           | None                                                                                                       | No                                                             |
| Olanzapine                           | Schizophrenia, 13-17<br><br>Bipolar disorder acute, 13-17<br><br>Bipolar disorder maintenance, 13-17       | No                                                             |
| Paliperidone                         | Schizophrenia, 12-17                                                                                       | No                                                             |
| Quetiapine                           | Schizophrenia, 13-17<br><br>Bipolar disorder acute, 10-17                                                  | No                                                             |
| Risperidone                          | Schizophrenia, 13-17<br><br>Bipolar disorder acute, 10-17<br><br>Irritability associated with autism, 5-16 | Yes                                                            |

|                                     |                                                                                                         |     |
|-------------------------------------|---------------------------------------------------------------------------------------------------------|-----|
| Ziprasidone                         | None                                                                                                    | No  |
| First Generation<br>Antipsychotics: |                                                                                                         |     |
| Chlorpromazine                      | Hyperactivity, 1 and older<br>Severe behavioral problems, 1 and older                                   | Yes |
| Fluphenazine                        | None                                                                                                    | No  |
| Haloperidol                         | Schizophrenia, 3 and older<br>Tourette's, 3 and older<br>Hyperactivity/severe behavioral problems, 3-12 | Yes |
| Loxapine                            | None                                                                                                    | No  |
| Perphenazine                        | Schizophrenia, 12 and older                                                                             | No  |
| Pimozide                            | Tourette disorder, 12 and older                                                                         | No  |
| Prochlorperazine                    | Schizophrenia, 2 and older                                                                              | Yes |
| Thioridazine                        | Schizophrenia (see note)                                                                                | No  |
| Trifluoperazine                     | Schizophrenia, 6 and older                                                                              | Yes |

Note: Due to a black box warning issued by the FDA in 2000, thioridazine is now only indicated for patients with schizophrenia who fail to show an acceptable response to adequate courses of treatment with other antipsychotic drugs. The values in the final column reflect the study period, 2008-2011.

Source: Christian R, Saavedra L, Gaynes BL, et al. Future research needs for first- and second-generation antipsychotics for children and young adults. Future Research Needs Papers #13, Report number 12-EHC042-EF, Agency for Healthcare Research and Quality, February 2012.
